# Supplementary material for: Strong thickness dependence in thin film photocatalytic heterojunctions: the ZnO–Bi2O3 case study
Source: Royal Society of Chemistry journal article supplement (doi:10.1039/d4dt00697f), 2024-01-01
Supplement: d4dt00697f1.pdf [file d4dt00697f1.pdf]

*SUPPLEMENTARY INFORMATION*

**“Strong thickness dependence in thin film photocatalytic heterojunctions:  
the ZnO-Bi<sub>2</sub>O<sub>3</sub> case study”**

Alberto Bernal-Díaz, Agileo Hernández-Gordillo, Juan Carlos Alonso, Sandra E. Rodil,  
Montserrat Bizarro\*.

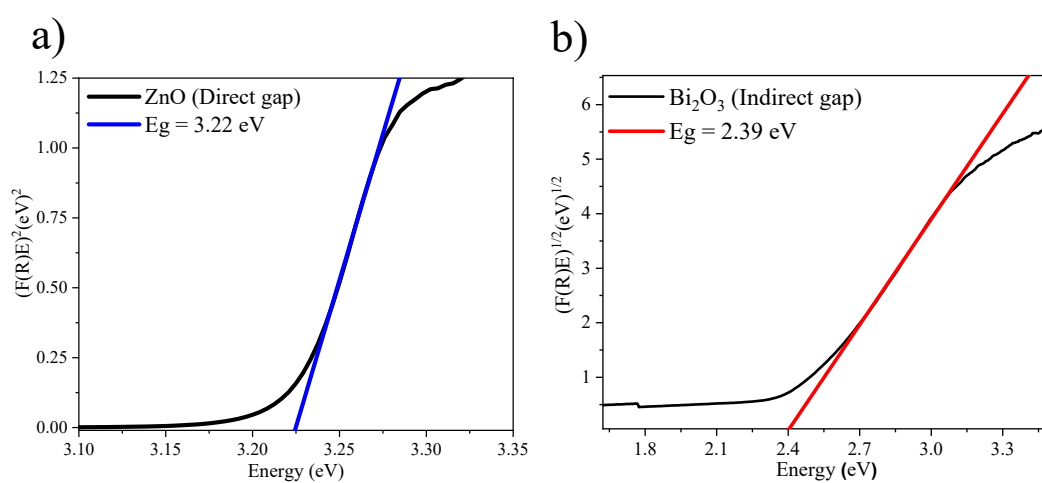

**Fig. S1** Determination of the energy band gap of a) ZnO and b) Bi<sub>2</sub>O<sub>3</sub> films.
